# Supplementary material for: In situ generation of photoactivatable aggregation-induced emission probes for organelle-specific imaging
Source: Royal Society of Chemistry journal article supplement (doi:10.1039/c8sc01887a), 2018-01-01
Supplement: c8sc01887a1.pdf [file c8sc01887a1.pdf]

## Supporting Information

### **In situ generation of photoactivatable aggregation-induced emission probe for organelle-specific imaging**

Shiwu Li,<sup>a,b</sup> Xia Ling,<sup>a</sup> Yuhan Lin,<sup>a</sup> Anjun Qin,<sup>a</sup> Meng Gao,<sup>\*c</sup> Ben Zhong Tang<sup>\*a,d</sup>

<sup>a</sup>Guangdong Innovative Research Team, Center for Aggregation-Induced Emission, State Key Laboratory of Luminescent Materials & Devices, South China University of Technology, Guangzhou 510640, China.

<sup>b</sup>School of Medicine, South China University of Technology, Guangzhou 510006, China.

<sup>c</sup>National Engineering Research Center for Tissue Restoration and Reconstruction, South China University of Technology, Guangzhou 510006, China.

<sup>d</sup>Department of Chemistry and Hong Kong Branch of Chinese National Engineering Research Center for Tissue Restoration and Reconstruction, The Hong Kong University of Science & Technology, Clear Water Bay, Kowloon, Hong Kong, China.

\*Corresponding Author: msmgao@scut.edu.cn; tangbenz@ust.hk

## Table of Contents

|                                                                                                                                                      |     |
|------------------------------------------------------------------------------------------------------------------------------------------------------|-----|
| Materials and chemicals                                                                                                                              | S3  |
| Equipment and methods                                                                                                                                | S3  |
| <b>Scheme S1.</b> Synthetic routes of compounds <b>1</b> , <b>3</b> , and <b>4</b>                                                                   | S9  |
| <b>Table S1</b> Photophysical properties of compounds <b>4</b>                                                                                       | S16 |
| <b>Fig. S1</b> <sup>1</sup> H and <sup>13</sup> C NMR spectra of <b>1a</b>                                                                           | S10 |
| <b>Fig. S2</b> <sup>1</sup> H and <sup>13</sup> C NMR spectra of <b>1b</b>                                                                           | S11 |
| <b>Fig. S3</b> <sup>1</sup> H and <sup>13</sup> C NMR spectra of <b>3a</b>                                                                           | S12 |
| <b>Fig. S4</b> <sup>1</sup> H and <sup>13</sup> C NMR spectra of <b>3b</b>                                                                           | S13 |
| <b>Fig. S5</b> <sup>1</sup> H and <sup>13</sup> C NMR spectra of <b>4a</b>                                                                           | S14 |
| <b>Fig. S6</b> <sup>1</sup> H and <sup>13</sup> C NMR spectra of <b>4b</b>                                                                           | S15 |
| <b>Fig. S7</b> The UV-Vis and PL spectra of <b>4</b>                                                                                                 | S16 |
| <b>Fig. S8</b> The <sup>1</sup> H NMR stacking spectra of ethyl mercaptoacetate, " <b>1</b> + ethyl mercaptoacetate" and 2,2'-disulfanediyldiacetate | S17 |
| <b>Fig. S9</b> The UV-Vis spectra of <b>1</b> , " <b>1</b> + ethyl mercaptoacetate", and <b>3</b>                                                    | S18 |
| <b>Fig. S10</b> The <sup>1</sup> H NMR stacking spectra of <b>1b</b> , " <b>1b</b> + ethyl mercaptoacetate", and <b>3b</b>                           | S18 |
| <b>Fig. S11</b> The HPLC spectra showing the complete in situ transformation                                                                         | S19 |
| <b>Fig. S12</b> The <sup>1</sup> H NMR spectra of the mixture of <b>1a</b> and ethyl mercaptoacetate under UV irradiation                            | S19 |
| <b>Fig. S13</b> The UV-Vis and PL spectra of in situ generated <b>3b</b> under UV irradiation                                                        | S20 |
| <b>Fig. S14</b> The bright field and fluorescence images of <b>3b</b> in solid state under UV irradiation                                            | S20 |
| <b>Fig. S15</b> The <sup>1</sup> H NMR spectra of the mixture of <b>1b</b> and ethyl mercaptoacetate under UV irradiation                            | S21 |
| <b>Fig. S16</b> The cell viabilities of HeLa and MCF-7 cells treated with ethyl mercaptoacetate                                                      | S21 |
| <b>Fig. S17</b> The cell viabilities of HeLa and MCF-7 cells treated with 2,2'-disulfanediyldiacetate                                                | S22 |
| <b>Fig. S18</b> The cell viabilities of HeLa and MCF-7 cells treated with in situ generated <b>3a</b>                                                | S22 |
| <b>Fig. S19</b> The cell viabilities of HeLa and MCF-7 cells treated with in situ generated <b>3b</b>                                                | S22 |
| <b>Fig. S20</b> The fluorescence images and PL spectra of HeLa cells treated with <b>3</b> and after photoactivation                                 | S23 |
| <b>Fig. S21</b> The intensity correlation plots for co-staining experiment                                                                           | S23 |
| <b>Fig. S22</b> The bright field and fluorescence images of MCF-7 cells stained with <b>3a</b> and co-stained with BODIPY493/503 Green               | S24 |
| <b>Fig. S23</b> The bright field and fluorescence images of MCF-7 cells stained with <b>3b</b> and co-stained with LysoTracker Red                   | S24 |
| <b>Fig. S24</b> Plots of fluorescence enhancement ( $I/I_0$ ) of HeLa cells under two-photon irradiation                                             | S25 |
| <b>Fig. S25</b> The PL spectra measurement for <b>3a</b> treated with chemical oxidants                                                              | S25 |
| <b>Fig. S26</b> The fluorescence images of HeLa and MCF-7 cells treated with <b>3</b> and chemical oxidants                                          | S26 |
| <b>References</b>                                                                                                                                    | S26 |

## Materials and chemicals

2-hydroxy-5-(morpholinomethyl) benzaldehyde, 2,2'-disulfidediyl dianiline, and 2-(2,3-dihydrobenzo[*d*]thiazol-2-yl)-4-methoxyphenol were prepared according to the literature method.<sup>1-4</sup> Morpholine, 2-Aminobenzenethiol and 2-hydroxy-5-methoxybenzaldehyde were purchased from Energy Chemical; CDCl<sub>3</sub> and DMSO-*d*<sub>6</sub> were purchased from Sigma-Aldrich; H<sub>2</sub>O<sub>2</sub> (30 wt.%), HOAc, K<sub>2</sub>CO<sub>3</sub>, MeOH and other solvent were purchased from Guangzhou Chemical Reagent Factory without further purification. THF was distilled from sodium under dry nitrogen prior to use.

Dulbecco's Modified Essential Medium (DMEM) and Hanks' Balanced Salt Solution (HBSS) buffer were purchased from Gibco (Life Technologies). Ultra pure water was supplied by Milli-Q Plus System (Millipore Corporation, United States). Phosphate buffered saline (PBS), fetal bovine serum (FBS), penicillin, streptomycin, BODIPY 493/503, and LysoTracker Red were purchased from Thermo Fisher Scientific. The HeLa and MCF-7 cell lines were purchased from the Cell Resource Center, Peking Union Medical College.

## Equipment and methods

UV-Vis absorption spectra were measured on a Shimadzu UV-2600 spectrophotometer, medium scanning rate, and quartz cuvettes of 1 cm path length. Photoluminescence spectra were recorded on a Horiba Fluoromax-4 spectrofluorometer. The absolute fluorescence quantum yield was measured using a Hamamatsu quantum yield spectrometer C11347 Quantaaurus\_QY. The fluorescence lifetime was measured using a Hamamatsu Compact Fluorescence Lifetime Spectrometer C11367. <sup>1</sup>H and <sup>13</sup>C NMR spectra were measured on a Bruker AV 500 NMR spectrometer. High resolution mass spectra (HRMS) were recorded on a Bruker maxis impact mass spectrometer operated in MALDI-TOF or ESI model. Confocal lasing scanning microscopic (CLSM) images

were obtained on the confocal microscope (Zeiss Laser Scanning Confocal Microscope; LSM710). Two-photon excited fluorescence images were obtained on the multiphoton laser scanning microscope (Olympus FV1200MPE). Fluorescence images were obtained on the fluorescence optical microscope (Zeiss Axio Vert.A1). Automated cell counter (Countess II) was employed for cell counting. The cell viability analysis for estimating cytotoxicity was collected using a microplate reader (Tecan Infinite M200 PRO) at a wavelength of 570 nm. The HPLC profiles were acquired on an Waters e2695 instrument with a SunFire C18 column (4.6 mm × 250 mm, 5 μm) and UV–Visible detector (Waters 2489) set at 315 nm, acetonitrile was used as the eluent with the flow rate of 0.6 mL min<sup>-1</sup>.

**Synthesis of 2,2'-disulfanediyl dianiline.** 2-Aminobenzenethiol (500 mg, 4 mmol) was first dissolved in methanol (5 mL), H<sub>2</sub>O<sub>2</sub> (30 wt.%, 0.5 mL) was then added with dropwise. The mixture was further stirred at room temperature for 30 min. After completion of the reaction, the mixture was filtered and the precipitation was washed by ethanol to afford a yellow solid (445 mg, yield 90%).

**Synthesis of 2-hydroxy-5-(morpholinomethyl)benzaldehyde.** 5-(Chloromethyl)-2-hydroxybenzaldehyde (850 mg, 5.0 mmol) was first dissolved in MeCN (10 mL), morpholine (479 μL, 5.5 mmol) and K<sub>2</sub>CO<sub>3</sub> (759 mg, 5.5 mmol) were then added into the mixture, which was stirred at room temperature for 0.5 h. After completion of the reaction, the K<sub>2</sub>CO<sub>3</sub> was removed by filtration. The filtrate solution was dried by evaporation under vacuum and further extracted with dichloromethane (40 mL × 3). The extracts were washed with brine, dried over anhydrous MgSO<sub>4</sub>, and concentrated under reduced pressure. The residue was further separated by column chromatography

(petroleum ether : ethyl acetate = 7 : 3) to afford a white solid (464 mg, yield 42%). <sup>1</sup>H NMR (CDCl<sub>3</sub>, 500 MHz) : 10.96 (br s, 1H), 9.90 (d, *J* = 0.5 Hz, 1H), 7.53-7.50 (m, 2H), 6.96 (d, *J* = 8.5 Hz, 1H), 3.72 (t, *J* = 4.5 Hz, 4H), 3.48 (s, 2H), 2.46 (br s, 4H).

**Synthesis of 2,2'-((1*E*,1'*E*)-((disulfanediy)bis(2,1-phenylene))bis(azanylylidene))bis(methanylylidene))bis(4-methoxyphenol) (1a).**

2,2'-Disulfanediyldianiline (248 mg, 1.0 mmol) was first dissolved in ethanol (10 mL), 2-hydroxy-5-methoxybenzaldehyde (380 mg, 2.5 mmol) and a drop of HOAc were then added. The mixture further reacted under reflux and nitrogen protection for 1 h. After completion of the reaction, the mixture was filtered and the precipitation was washed by ethanol to afford a yellow solid (495 mg, yield 96%). <sup>1</sup>H NMR (DMSO-*d*<sub>6</sub>, 500 MHz) : 11.98 (s, 2H), 9.00 (s, 2H), 7.59 (dd, *J*<sub>1</sub> = 8.0 Hz, *J*<sub>2</sub> = 1.5 Hz, 2H), 7.49 (dd, *J*<sub>1</sub> = 8.0 Hz, *J*<sub>2</sub> = 1.0 Hz, 2H), 7.37 (td, *J*<sub>1</sub> = 7.5 Hz, *J*<sub>2</sub> = 1.5 Hz, 2H), 7.32-7.29(m, 4H), 7.10 (dd, *J*<sub>1</sub> = 9.0 Hz, *J*<sub>2</sub> = 3.0 Hz, 2H), 6.96 (d, *J* = 9.0 Hz, 2H), 3.77 (s, 6H); <sup>13</sup>C NMR (DMSO-*d*<sub>6</sub>, 125 MHz) : 163.0, 154.3, 152.0, 146.1, 130.4, 128.1, 127.9, 126.0, 121.2, 119.3, 118.3, 117.6, 115.1, 55.6. HRMS (MALDI-TOF): *m/z* [M + H]<sup>+</sup> calcd. for C<sub>28</sub>H<sub>25</sub>N<sub>2</sub>O<sub>4</sub>S<sub>2</sub>, 517.1250, found, 517.1301.

**Synthesis of 2,2'-((1*E*,1'*E*)-((disulfanediy)bis(2,1-phenylene))bis(azanylylidene))bis(methanylylidene))bis(4-**

**(morpholinomethyl)phenol (1b).** 2,2'-Disulfanediyldianiline (62 mg, 0.3 mmol) was first dissolved in ethanol (5 mL), 2-hydroxy-5-(morpholinomethyl)benzaldehyde (130 mg, 0.6 mmol) and a drop of HOAc were then added. The mixture was further stirred under nitrogen protection for 1 h. After completion of the reaction, the mixture was

filtered and the precipitation was washed by ethanol to afford a light yellow solid (152 mg, yield 78%). <sup>1</sup>H NMR (DMSO-*d*<sub>6</sub>, 500 MHz): δ 12.51 (s, 2H), 9.03 (s, 2H), 7.65 (d, *J* = 1.5 Hz, 2H), 7.58 (*J*<sub>1</sub> = 7.5 Hz, *J*<sub>2</sub> = 1.5 Hz, 2H), 7.51 (dd, *J*<sub>1</sub> = 7.5 Hz, *J*<sub>2</sub> = 1.0 Hz, 2H), 7.41-7.35 (m, 4H), 7.31-7.28 (m, 2H), 6.97 (d, *J* = 8.5 Hz, 2H), 3.58 (t, *J* = 4.5 Hz, 8H), 3.44 (s, 4H), 2.37 (s, 8H); <sup>13</sup>C NMR (DMSO-*d*<sub>6</sub>, 125 MHz): 163.6, 159.2, 146.1, 134.7, 132.9, 130.3, 128.6, 128.2, 127.9, 126.1, 119.0, 118.5, 116.6, 66.2, 61.6, 53.1. HRMS (ESI): *m/z* [M + H]<sup>+</sup> calcd. for C<sub>36</sub>H<sub>39</sub>N<sub>4</sub>O<sub>4</sub>S<sub>2</sub>, 655.2407, found, 655.2415.

**Synthesis of compound 2-(2,3-dihydrobenzo[d]thiazol-2-yl)-4-methoxyphenol (3a).**

2-Aminobenzenethiol (625 mg, 5.0 mmol) and 2-hydroxy-5-methoxybenzaldehyde (760 mg, 5.0 mmol) were dissolved in methanol (10 mL) under nitrogen protection. The mixture was stirred at room temperature for 20 min. After completion of the reaction, the mixture was filtered and the precipitation was washed by methanol to afford a white solid (776 mg, yield 60%). <sup>1</sup>H NMR (DMSO-*d*<sub>6</sub>, 500 MHz): δ 9.35 (s, 1H), 6.95-6.93 (m, 2H), 6.86 (td, *J*<sub>1</sub> = 9.5 Hz, *J*<sub>2</sub> = 1.5 Hz, 1H), 6.78-6.65 (m, 4H), 6.57 (td, *J*<sub>1</sub> = 9.5 Hz, *J*<sub>2</sub> = 1.5 Hz, 1H), 6.43 (d, *J* = 3.0 Hz, 1H), 3.62 (s, 3H); <sup>13</sup>C NMR (DMSO-*d*<sub>6</sub>, 125 MHz): 152.0, 147.7, 147.3, 130.3, 125.2, 125.1, 121.2, 118.6, 115.5, 113.2, 111.9, 108.7, 63.2, 55.3.

**Synthesis of compound 2-(2,3-dihydrobenzo[d]thiazol-2-yl)-4-**

**(morpholinomethyl)phenol (3b).** 2-Aminobenzenethiol (125 mg, 1.0 mmol) and 2-hydroxy-5-(morpholinomethyl)benzaldehyde (221 mg, 1.0 mmol) were dissolved in methanol (5 mL) under nitrogen protection. The mixture was stirred at room temperature for 20 min. After completion of the reaction, the mixture was evaporated

under reduced pressure and the residue was recrystallized with methanol. After further drying under vacuum, a white solid was obtained (171 mg, yield 52%). <sup>1</sup>H NMR (DMSO-*d*<sub>6</sub>, 500 MHz): δ 9.75 (s, 1H), 7.37 (d, *J* = 2.0 Hz, 1H), 7.02 (dd, *J*<sub>1</sub> = 8.5 Hz, *J*<sub>2</sub> = 2.0 Hz, 1H), 6.93 (d, *J* = 7.5 Hz, 1H), 6.86 (td, *J*<sub>1</sub> = 7.5 Hz, *J*<sub>2</sub> = 1.0 Hz, 1H), 6.76 (d, *J* = 8.0 Hz, 2H), 6.65 (d, *J* = 7.5 Hz, 1H), 6.56 (td, *J*<sub>1</sub> = 7.5 Hz, *J*<sub>2</sub> = 1.0 Hz, 1H), 6.50 (d, *J* = 2.5 Hz, 1H), 3.51 (t, *J* = 4.5 Hz, 4H), 3.30 (d, *J* = 5.0 Hz, 2H), 2.27 (s, 4H); <sup>13</sup>C NMR (DMSO-*d*<sub>6</sub>, 125 MHz): 152.7, 147.8, 129.3, 128.9, 127.7, 126.7, 125.3, 125.1, 121.1, 118.4, 114.6, 108.6, 66.1, 63.3, 62.2, 53.0.

**Synthesis of 2-(benzo[d]thiazol-2-yl)-4-methoxyphenol (4a).** 2-Aminobenzenethiol (250 mg, 2.0 mmol) and 2-hydroxy-5-methoxybenzaldehyde (304 mg, 2.0 mmol) were first dissolved in methanol (5 mL), conc. HCl (37 wt.%, 169 μL) and H<sub>2</sub>O<sub>2</sub> (30 wt.%, 188 μL) were then added in to the mixture, which was further stirred at room temperature for 2 h. After completion of the reaction, the precipitation was filtered and washed by methanol (10 mL × 2). After further drying under vacuum, a white solid was obtained (493 mg, yield 96%). <sup>1</sup>H NMR (DMSO-*d*<sub>6</sub>, 500 MHz): δ 11.03 (s, 1H), 8.14 (d, *J* = 8.0 Hz, 1H), 8.07 (d, *J* = 8.0 Hz, 1H), 7.72 (d, *J* = 3.0 Hz, 1H), 7.54 (td, *J*<sub>1</sub> = 8.0 Hz, *J*<sub>2</sub> = 1.0 Hz, 1H), 7.44 (td, *J*<sub>1</sub> = 8.0 Hz, *J*<sub>2</sub> = 1.0 Hz, 1H), 7.06-7.01 (m, 2H), 3.81 (s, 3H); <sup>13</sup>C NMR (DMSO-*d*<sub>6</sub>, 125 MHz): 164.3, 152.2, 151.4, 150.4, 134.7, 126.4, 125.0, 122.2, 121.9, 119.7, 118.7, 118.0, 111.1, 55.6. HRMS (ESI): *m/z* [M + H]<sup>+</sup> calcd. for C<sub>14</sub>H<sub>12</sub>NO<sub>2</sub>S, 258.0583, found, 258.0581.

**Synthesis of 2-(benzo[d]thiazol-2-yl)-4-(morpholinomethyl)phenol (4b).** 2-Aminobenzenethiol (63 mg, 0.5 mmol) and 2-hydroxy-5-

(morpholinomethyl)benzaldehyd (111 mg, 0.5 mmol) were dissolved in methanol (5 mL), conc. HCl (37 wt.%, 42  $\mu$ L) and H<sub>2</sub>O<sub>2</sub> (30 wt.%, 47  $\mu$ L) were then added. The mixture was stirred at room temperature for 2 h. After completion of the reaction, the solvent was evaporated under reduced pressure and the residue was purified by repeated washing with THF. After filtration and further drying under vacuum, a grey solid was obtained (124 mg, yield 76%). <sup>1</sup>H NMR (DMSO-*d*<sub>6</sub>, 500 MHz):  $\delta$  12.04 (br s, 1H), 8.12 (d, *J* = 8.0 Hz, 2H), 8.04 (d, *J* = 8.0 Hz, 1H), 7.52 (t, *J* = 7.5 Hz, 1H), 7.42 (t, *J* = 7.5 Hz, 1H), 7.30 (d, *J* = 8.0 Hz, 1H), 7.03 (d, *J* = 8.5 Hz, 1H), 3.58 (s, 4H), 3.45 (s, 2H), 2.38 (s, 4H); <sup>13</sup>C NMR (DMSO-*d*<sub>6</sub>, 125 MHz): 165.1, 151.6, 135.1, 133.1, 128.5, 125.8, 124.2, 123.9, 121.7, 121.4, 118.5, 117.8, 66.2, 62.3, 53.1. HRMS (ESI): *m/z* [M + H]<sup>+</sup> calcd. for C<sub>18</sub>H<sub>19</sub>N<sub>2</sub>O<sub>2</sub>S, 327.1162, found, 327.1157.

### Cell viability measurement

The cells were seeded in a 96-well plate at a density of  $2 \times 10^5$  cells/mL. After 24 h of culture, different concentrations of the in situ generated compound **3** were added and further incubated for 24 h. The sample and control wells were washed twice with PBS buffer and added with freshly prepared MTT solution (0.5 mg/mL, 100  $\mu$ L). After incubation at 37 °C for 4 h, the MTT solution was removed and washed twice with PBS buffer. DMSO (100  $\mu$ L) was then added into each well and the plate was gently shaken for 10 min at room temperature to dissolve all the precipitates formed. The absorbance of sample and control wells at 570 nm was then measured by a microplate Reader. Cell viability was then calculated by the ratio of the absorbance of sample wells to control cells.



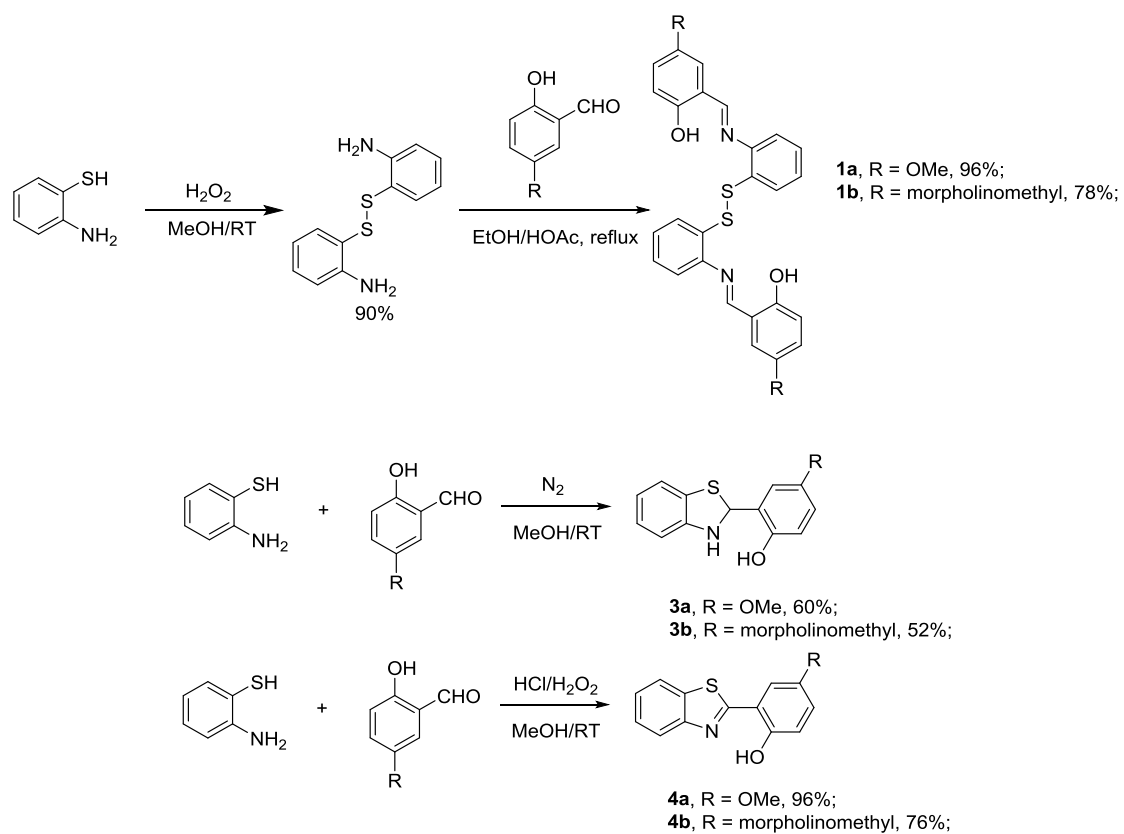

**Scheme S1** Synthetic routes of compounds **1**, **3**, and **4**.

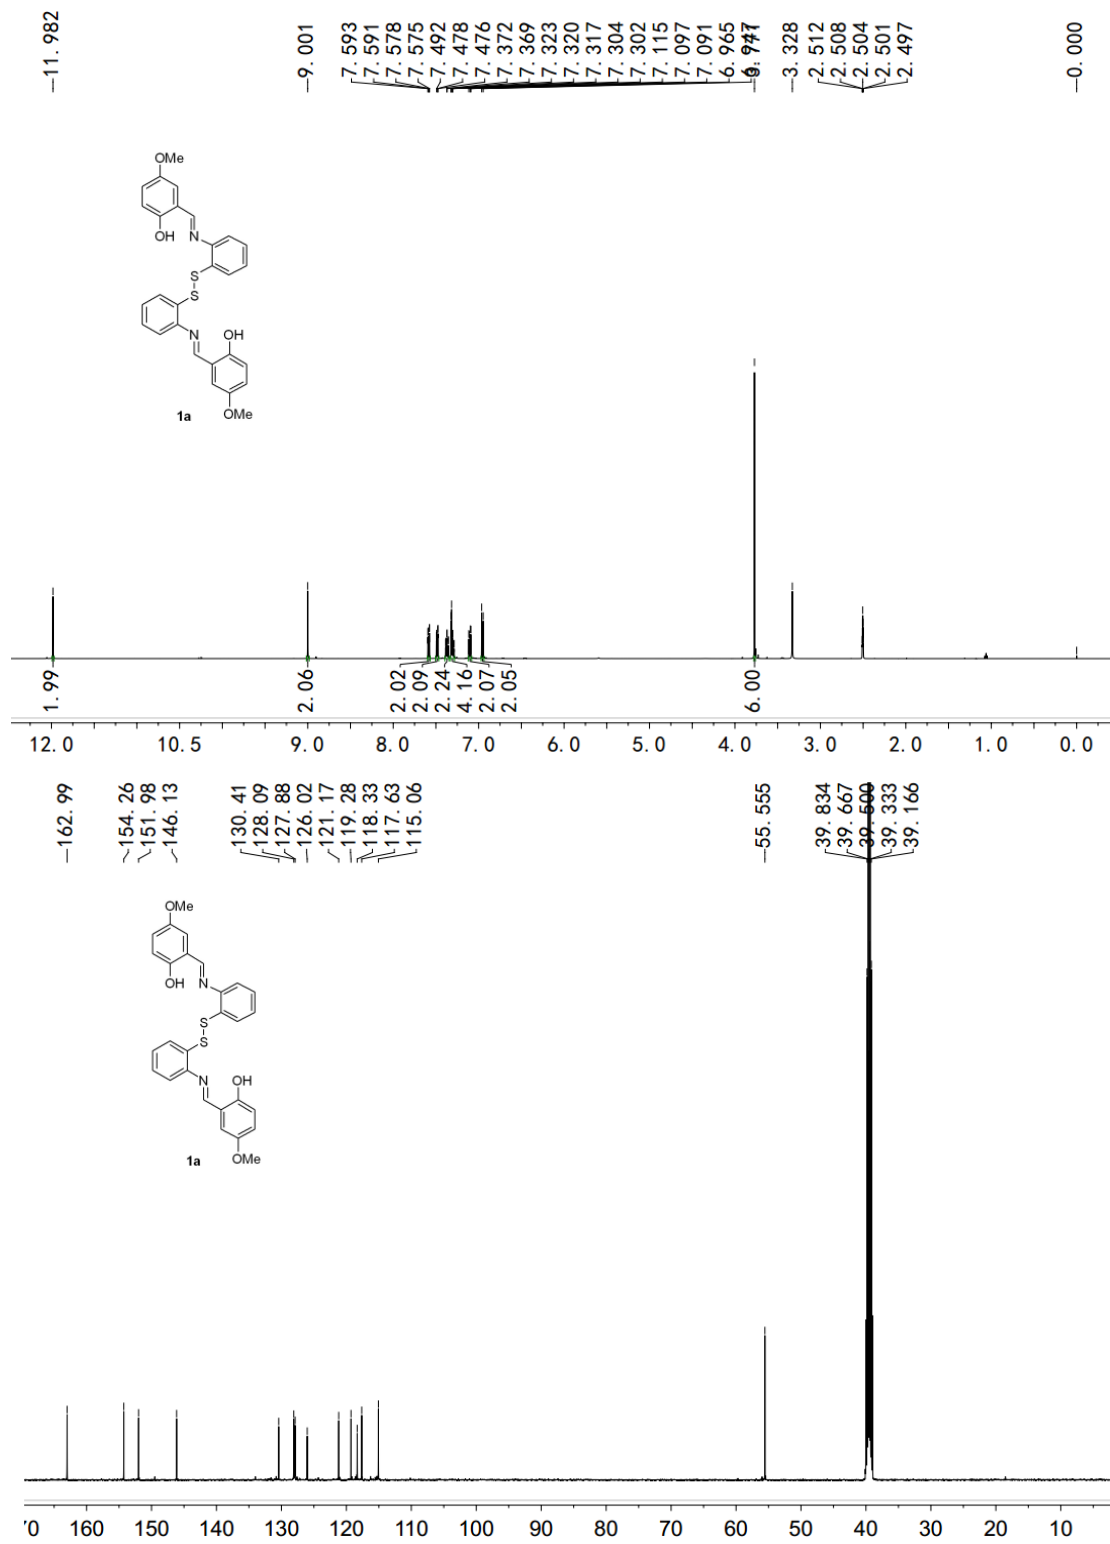

**Fig. S1** <sup>1</sup>H and <sup>13</sup>C NMR spectra of **1a**.

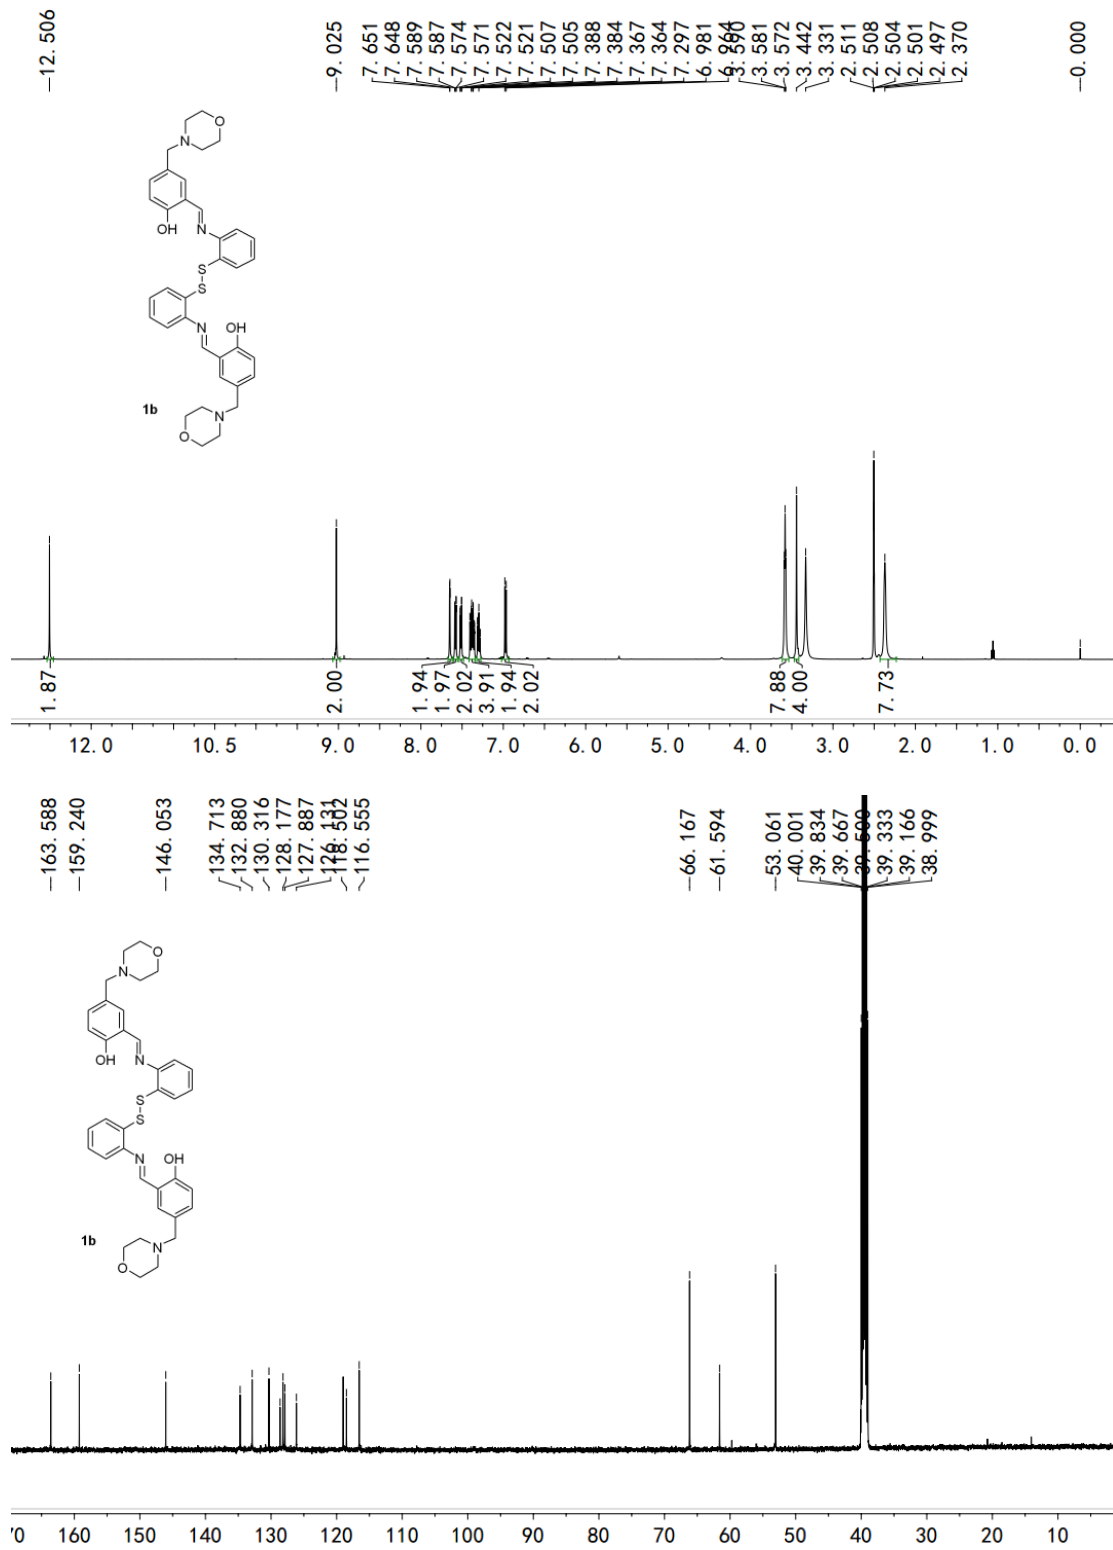

**Fig. S2** <sup>1</sup>H and <sup>13</sup>C NMR spectra of **1b**.

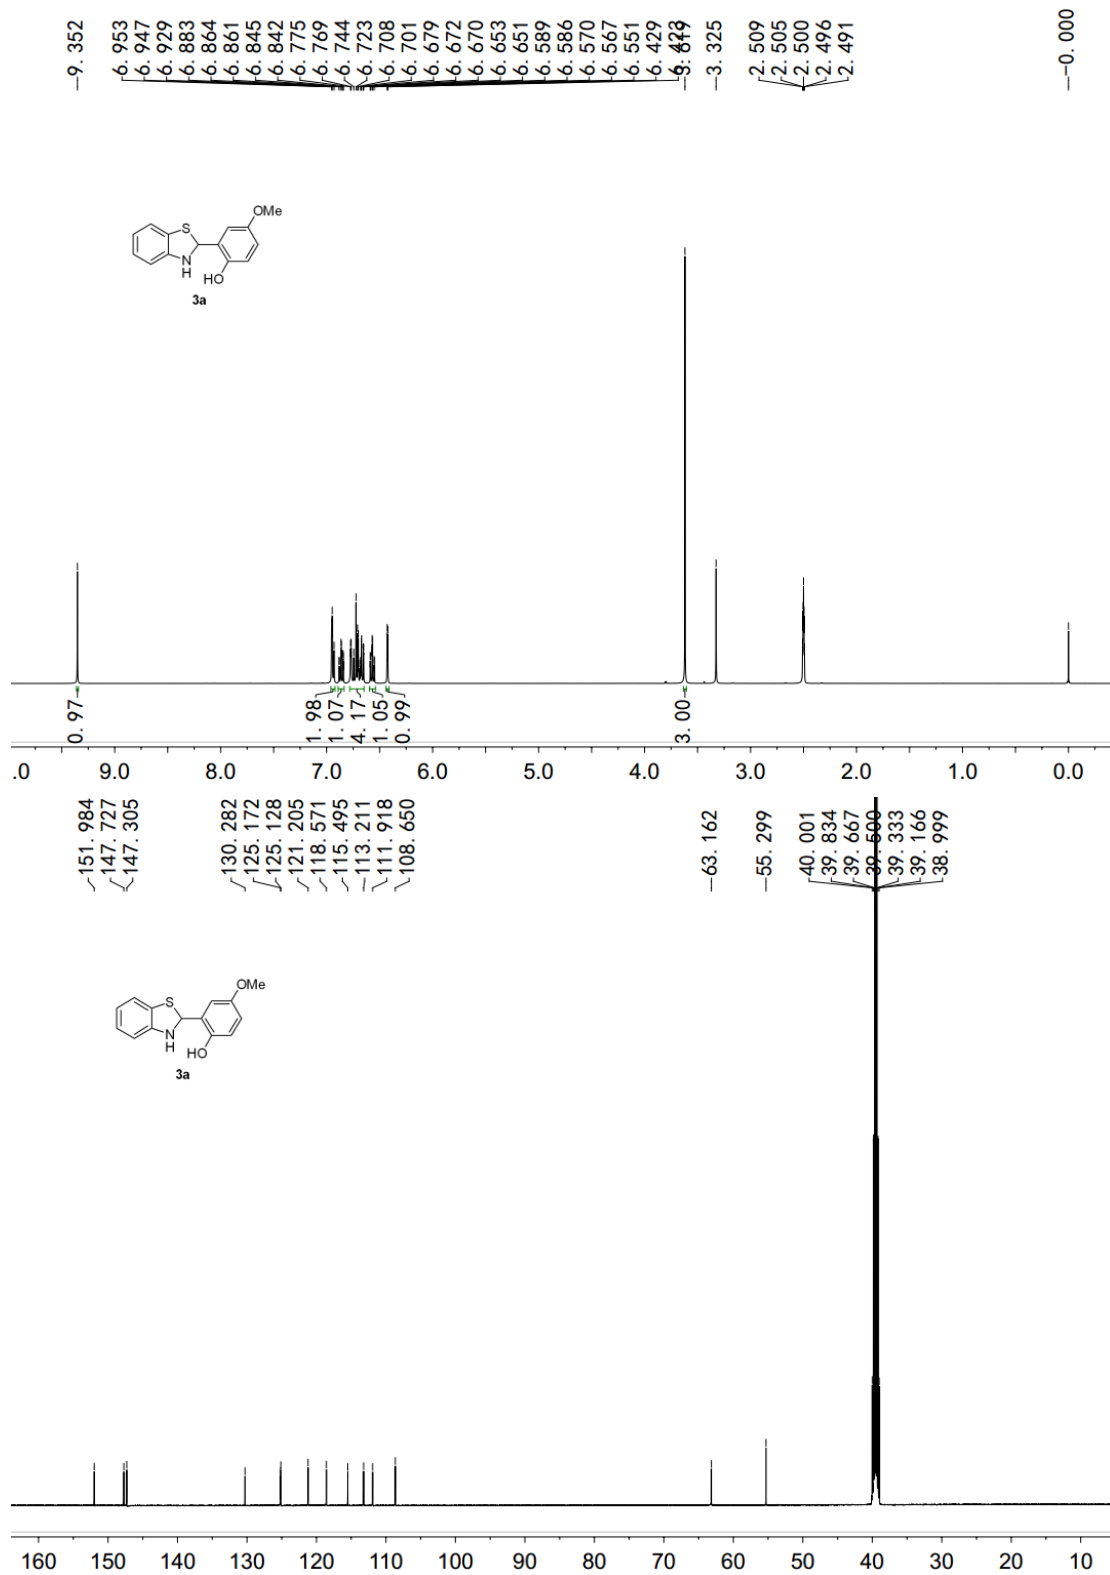

**Fig. S3**  $^1\text{H}$  and  $^{13}\text{C}$  NMR spectra of **3a**.

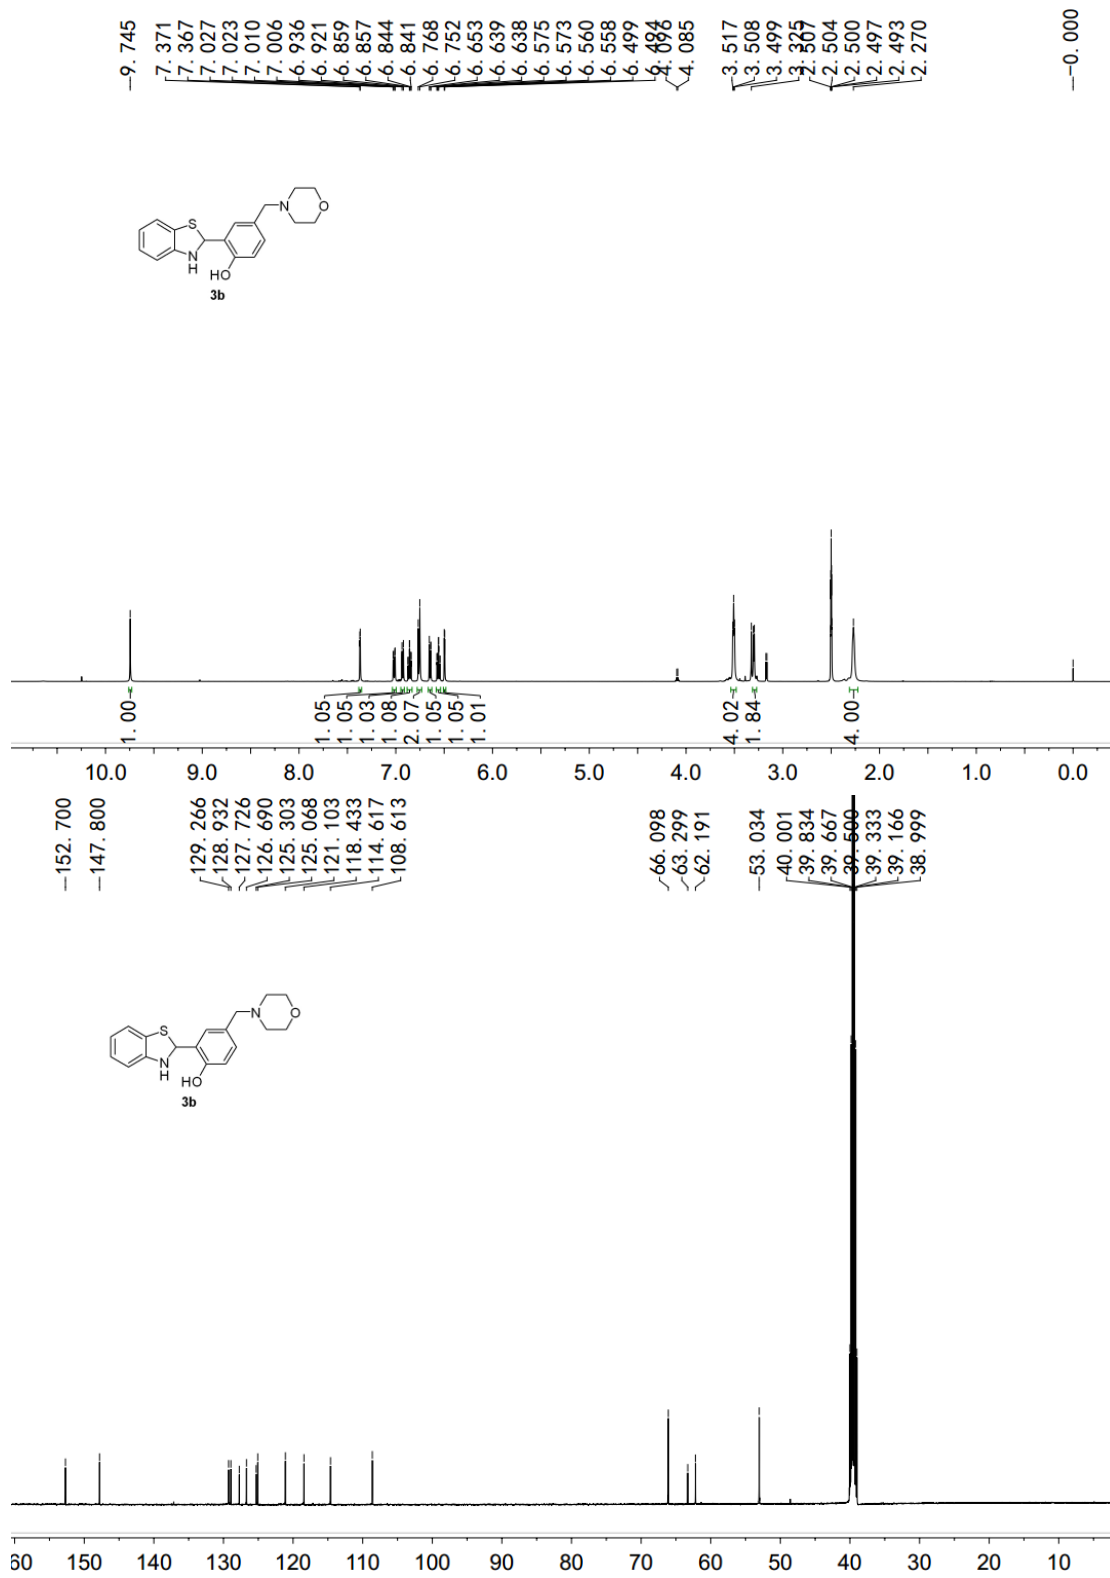

**Fig. S4** <sup>1</sup>H and <sup>13</sup>C NMR spectra of **3b**.

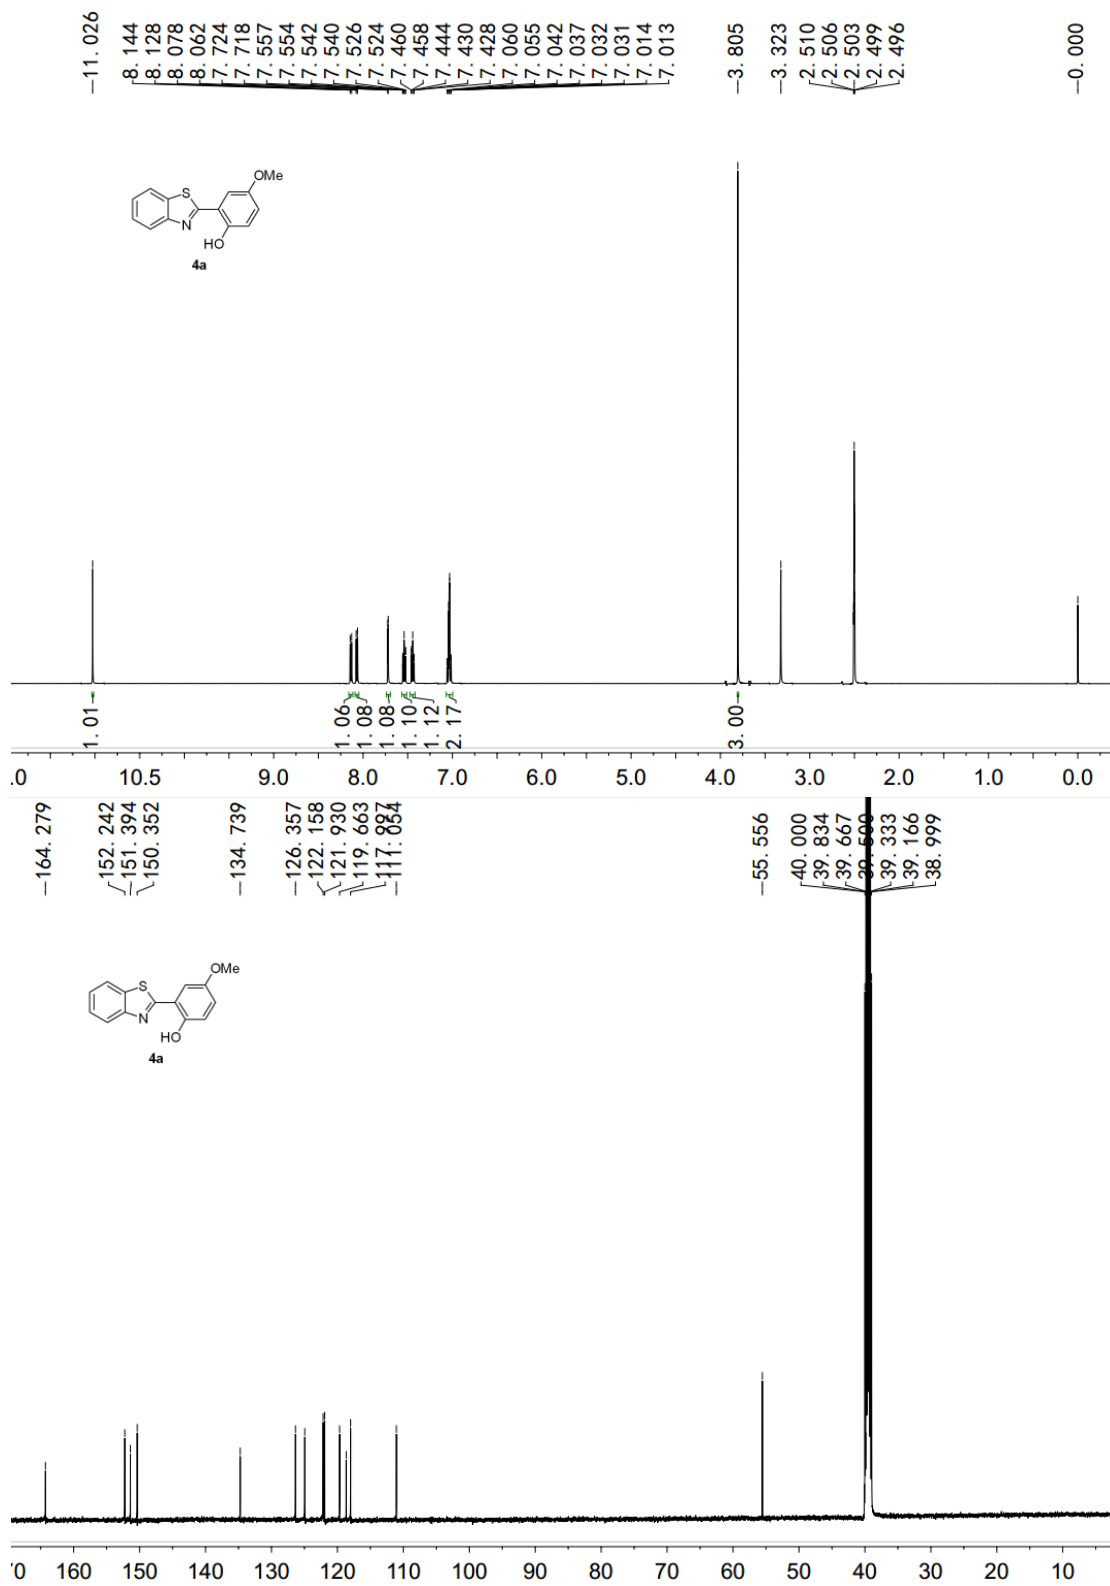

**Fig. S5** <sup>1</sup>H and <sup>13</sup>C NMR spectra of **4a**.

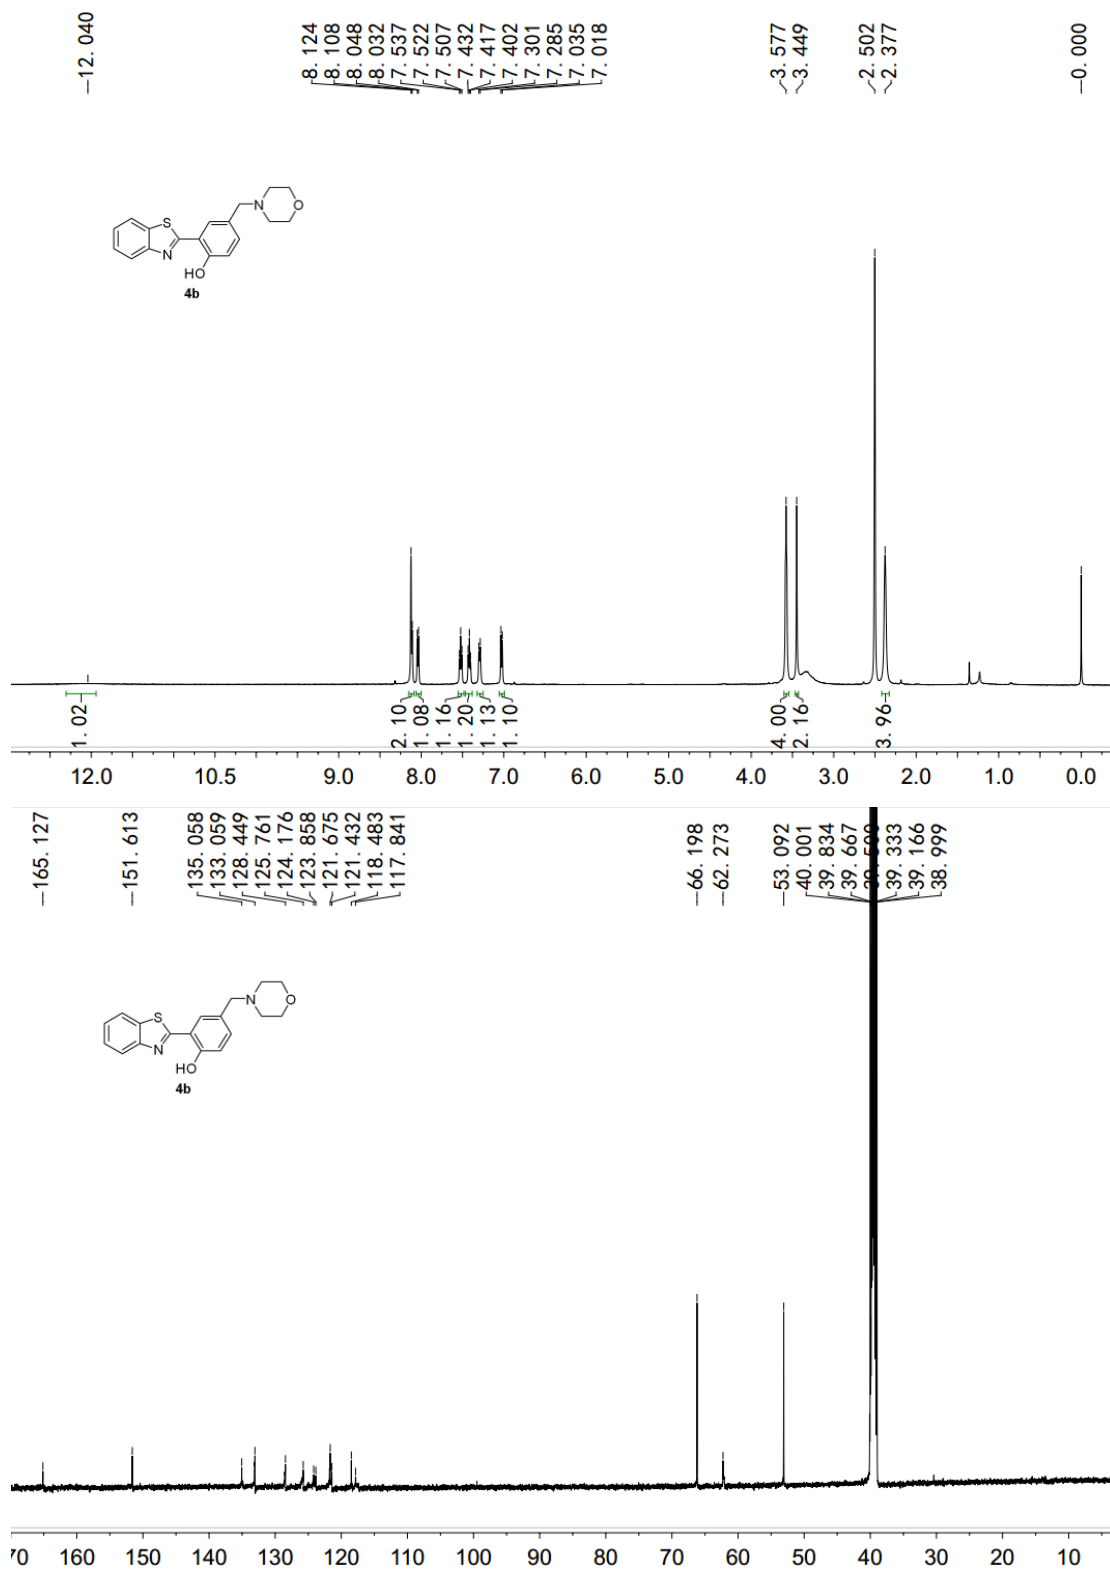

**Fig. S6** <sup>1</sup>H and <sup>13</sup>C NMR spectra of **4b**.

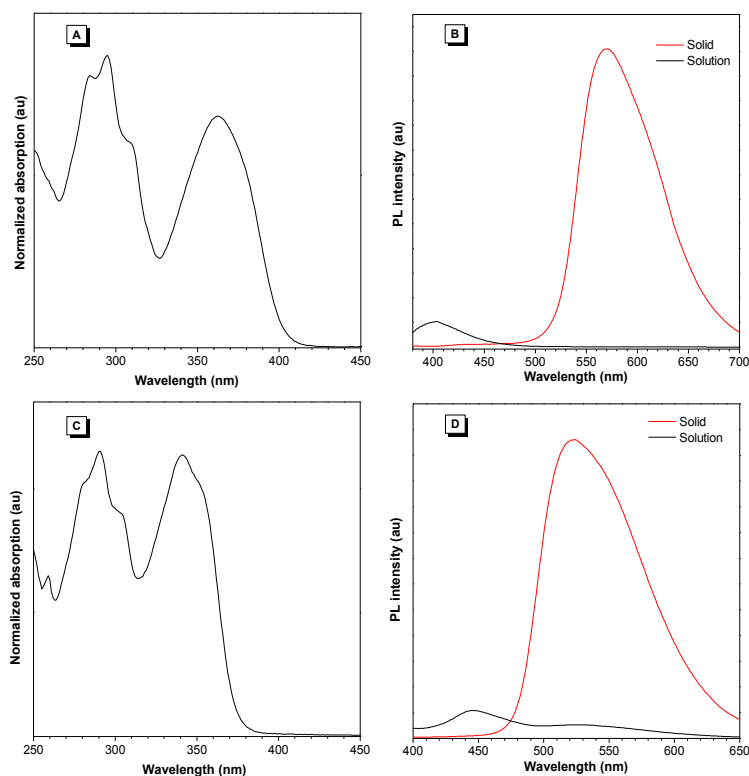

**Fig. S7** (A) The normalized UV–Vis absorption spectra of **4a** in THF solution. (B) The PL spectra of **4a** in THF solution and at solid state; [**4a**] = 10  $\mu$ M;  $\lambda_{\text{ex}}$  = 362 nm. (C) The normalized UV–Vis absorption spectra of **4b** in THF solution. (D) The PL spectra of **4b** in THF solution and at solid state; [**4b**] = 10  $\mu$ M;  $\lambda_{\text{ex}}$  = 341 nm.

**Table S1.** Photophysical properties of compound **4** in THF solution (Soln) and solid (Solid) states.

| <b>4</b>  | Soln <sup>a)</sup>                          |                                             |                                        |                              |                                                                    |                                                                     | Solid <sup>b)</sup>                         |                                        |                              |                                                                    |                                                                     |
|-----------|---------------------------------------------|---------------------------------------------|----------------------------------------|------------------------------|--------------------------------------------------------------------|---------------------------------------------------------------------|---------------------------------------------|----------------------------------------|------------------------------|--------------------------------------------------------------------|---------------------------------------------------------------------|
|           | $\lambda_{\text{ab}}$<br>[nm] <sup>c)</sup> | $\lambda_{\text{em}}$<br>[nm] <sup>d)</sup> | $\Phi_{\text{F}}$<br>[%] <sup>e)</sup> | $\tau$<br>(ns) <sup>f)</sup> | $k_{\text{r}}$<br>[10 <sup>7</sup> S <sup>-1</sup> ] <sup>g)</sup> | $k_{\text{nr}}$<br>[10 <sup>8</sup> S <sup>-1</sup> ] <sup>h)</sup> | $\lambda_{\text{em}}$<br>[nm] <sup>d)</sup> | $\Phi_{\text{F}}$<br>[%] <sup>e)</sup> | $\tau$<br>(ns) <sup>f)</sup> | $k_{\text{r}}$<br>[10 <sup>7</sup> S <sup>-1</sup> ] <sup>g)</sup> | $k_{\text{nr}}$<br>[10 <sup>8</sup> S <sup>-1</sup> ] <sup>h)</sup> |
| <b>4a</b> | 362                                         | 404                                         | 1.2                                    | 0.94                         | 1.28                                                               | 10.5                                                                | 570                                         | 40.1                                   | 4.88                         | 8.22                                                               | 1.23                                                                |
| <b>4b</b> | 341                                         | 446                                         | 1.1                                    | 1.56                         | 0.71                                                               | 6.34                                                                | 523                                         | 28.4                                   | 6.39                         | 4.44                                                               | 1.12                                                                |

a) In THF solution with a concentration of 10<sup>-5</sup> M; b) solid powder; c) Maximum absorption wavelength; d) Maximum emission wavelength; e) Absolute quantum yield; f) Average fluorescence lifetime; g) Radiative relaxation rate  $k_{\text{r}} = \Phi/\tau$ ; h) Non-radiative relaxation rate  $k_{\text{nr}} = (1-\Phi)/\tau$ .



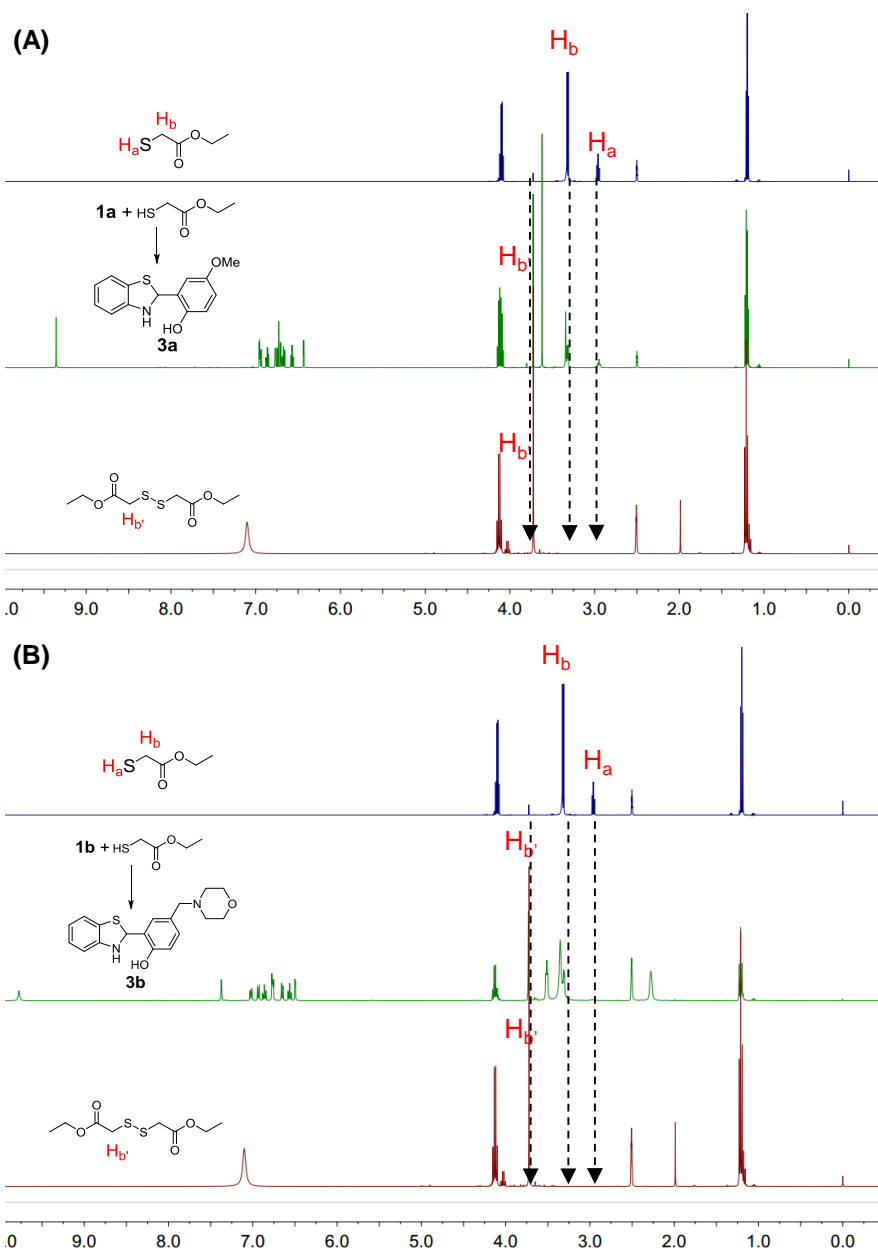

**Fig. S8** The  $^1\text{H}$  NMR stacking spectra: (A) ethyl mercaptoacetate, "**1a** + ethyl mercaptoacetate", and 2,2'-disulfanediyldiacetate; (B) ethyl mercaptoacetate, "**1b** + ethyl mercaptoacetate", and 2,2'-disulfanediyldiacetate.

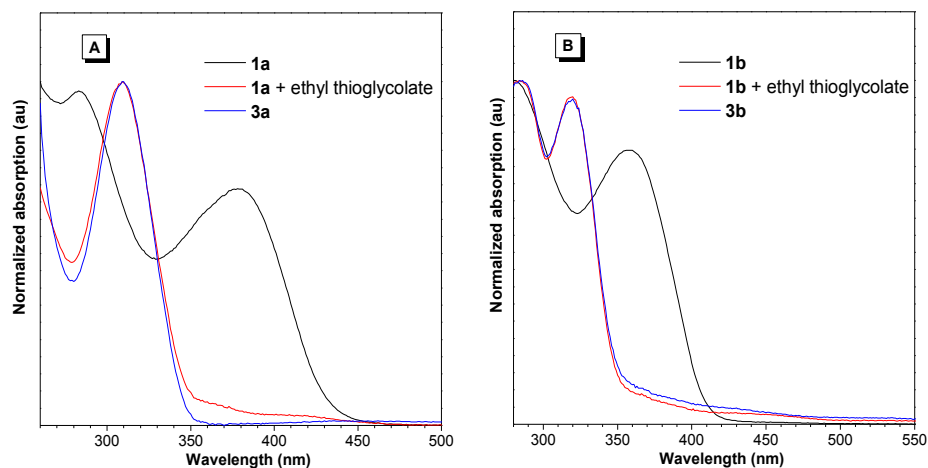

**Fig. S9** The normalized UV-Vis spectra of (A) **1a**, "**1a** + ethyl mercaptoacetate", and **3a**; (B) **1b**, "**1b** + ethyl mercaptoacetate", and **3b**. [**1a**] = [**1b**] = 10  $\mu$ M; [**3a**] = [**3b**] = 20  $\mu$ M.

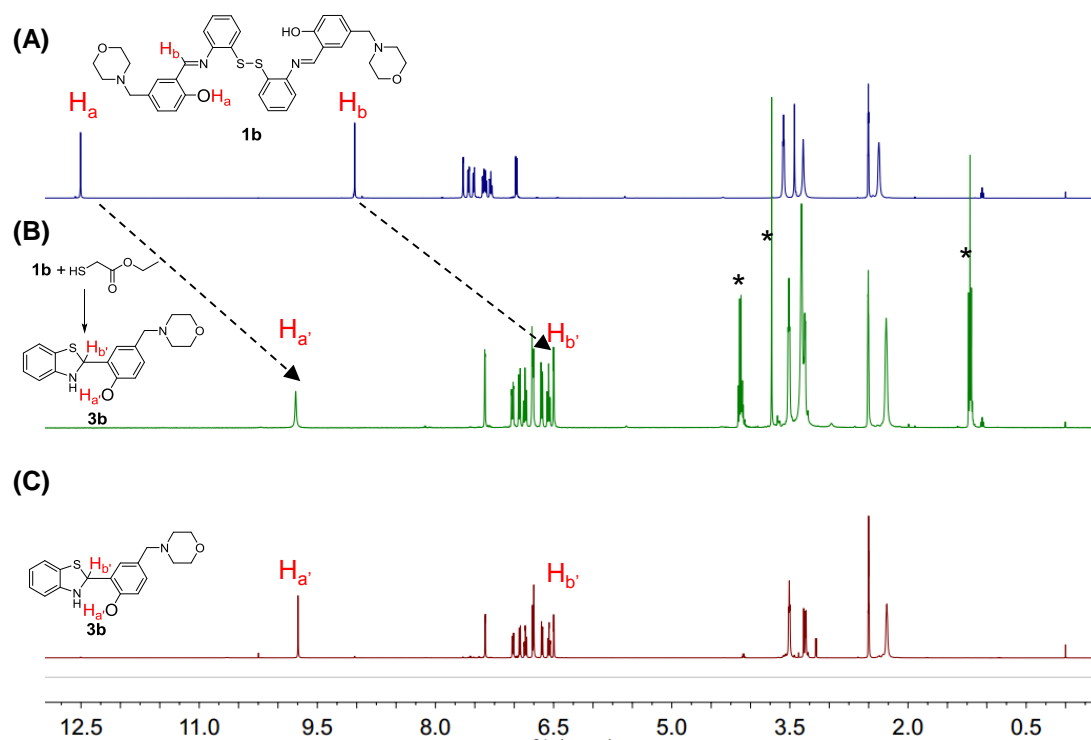

**Fig. S10** The  $^1\text{H}$  NMR stacking spectra of (A) **1b**, (B) "**1b** + ethyl mercaptoacetate", and (C) **3b**. (\* represents diethyl 2,2'-disulfanediyldiacetate)

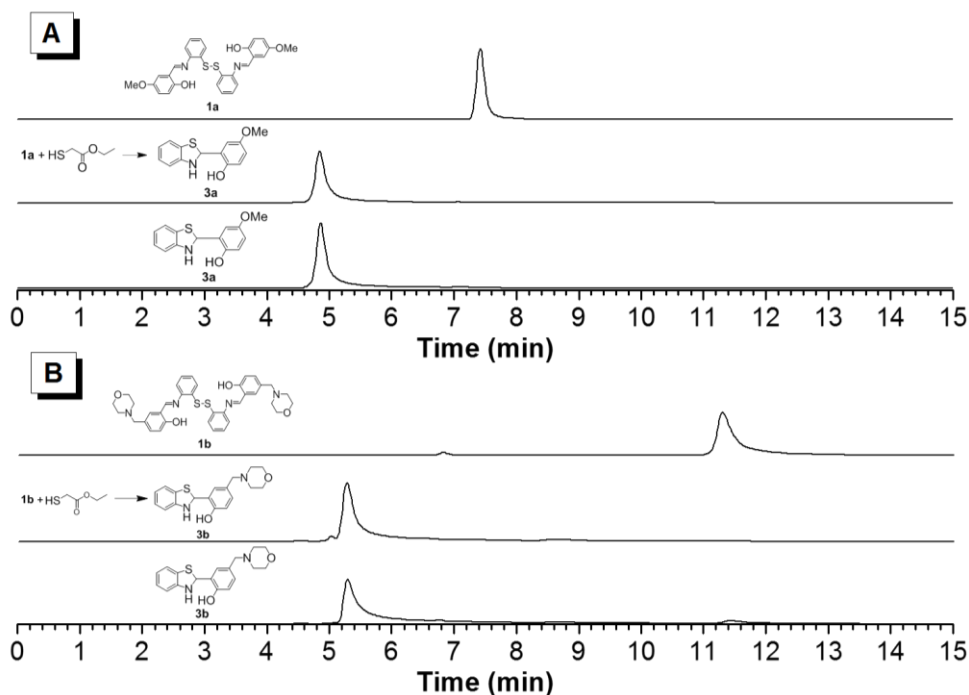

**Fig. S11** The HPLC spectra showing the complete in situ transformation of disulfide and thiol substrates into 2-(2-hydroxyphenyl)-benzothiazolines: (A) **1a**, "**1a** + ethyl mercaptoacetate", and purified **3a**; (B) **1b**, "**1b** + ethyl mercaptoacetate", and purified **3b**.

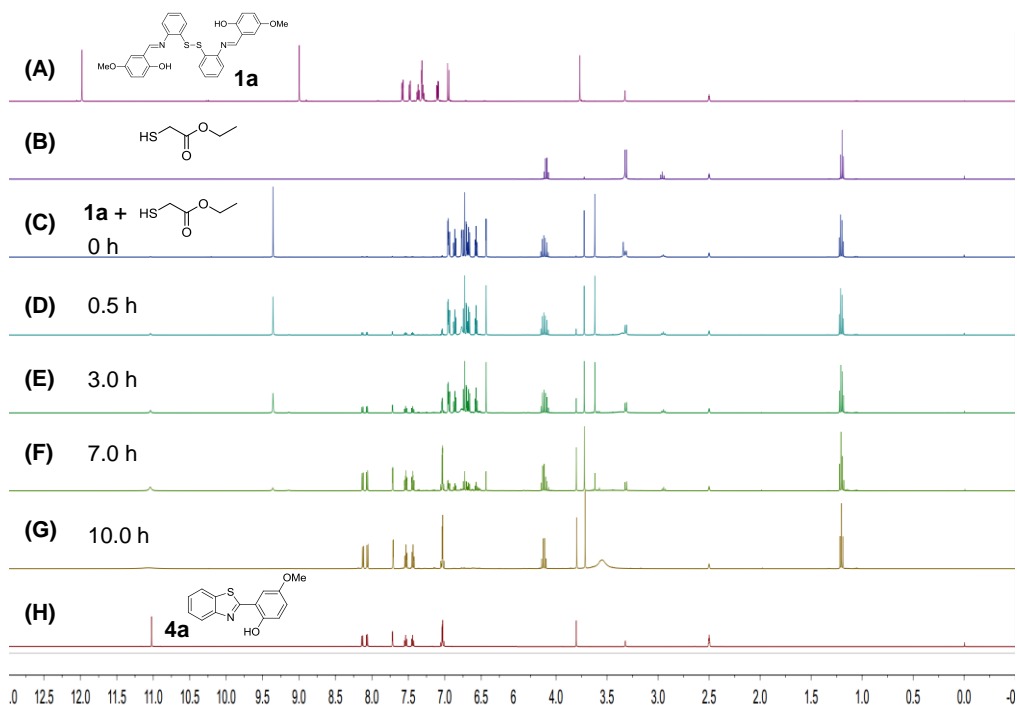

**Fig. S12** The <sup>1</sup>H NMR stacking spectra for in situ monitoring of the reaction between **1a** and ethyl mercaptoacetate under UV irradiation (365 nm).

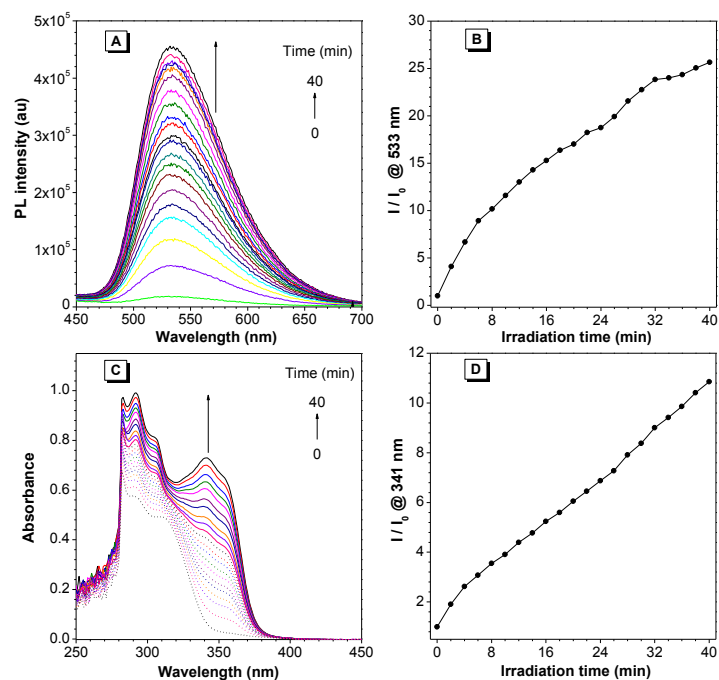

**Fig. S13** (A) The PL spectra of in situ generated **3b** in DMSO/toluene mixture (v/v, 1/99) under irradiation at 365 nm for 0–20 min. (B) Plot of relative PL intensity  $I/I_0$  at 533 nm versus the irradiation time. (C) The UV-Vis spectra of in situ generated **3b** in DMSO/toluene mixture (v/v, 1/99) under irradiation at 365 nm for 0–20 min. (D) Plot of relative UV-Vis absorption intensity  $I/I_0$  at 341 nm versus the irradiation time. [**3b**] = 100  $\mu$ M.

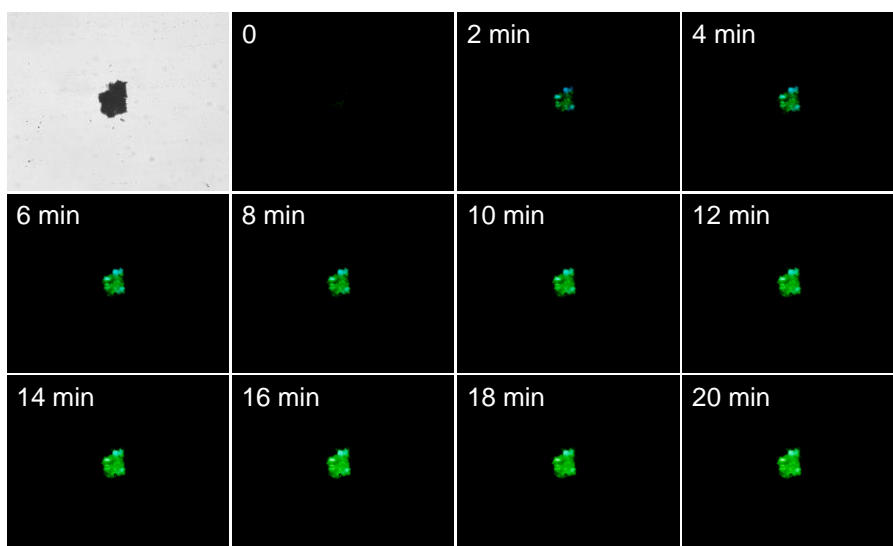

**Fig. S14** Bright field and fluorescence images of **3b** in the solid state taken under white light and UV irradiation (365 nm).

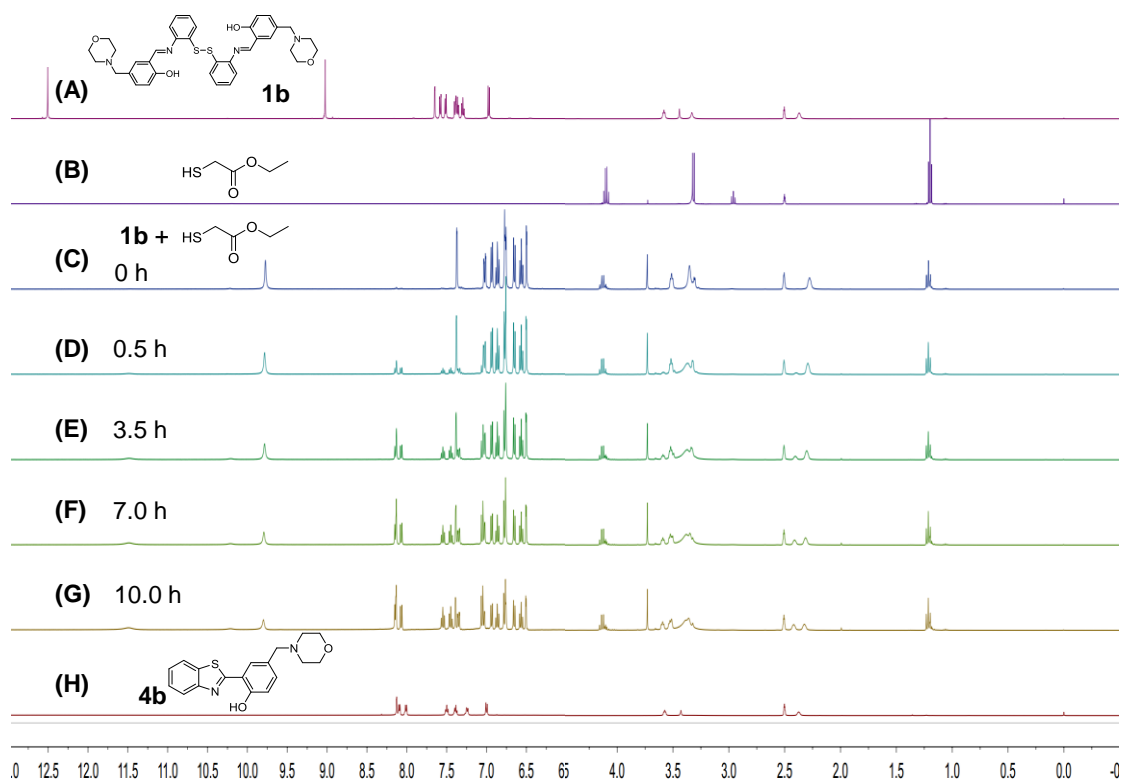

**Fig. S15** The  $^1\text{H}$  NMR spectra for in situ monitoring of the reaction between **1b** and ethyl mercaptoacetate under UV irradiation (365 nm).

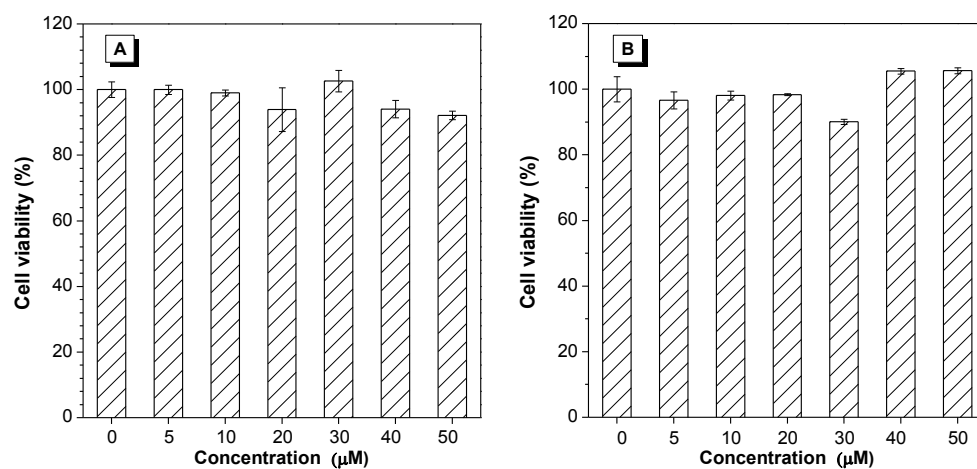

**Fig. S16** The cell viabilities of (A) HeLa cells and (B) MCF-7 cells treated with ethyl mercaptoacetate at different concentrations (0, 5, 10, 20, 30, 40, and 50  $\mu\text{M}$ ).

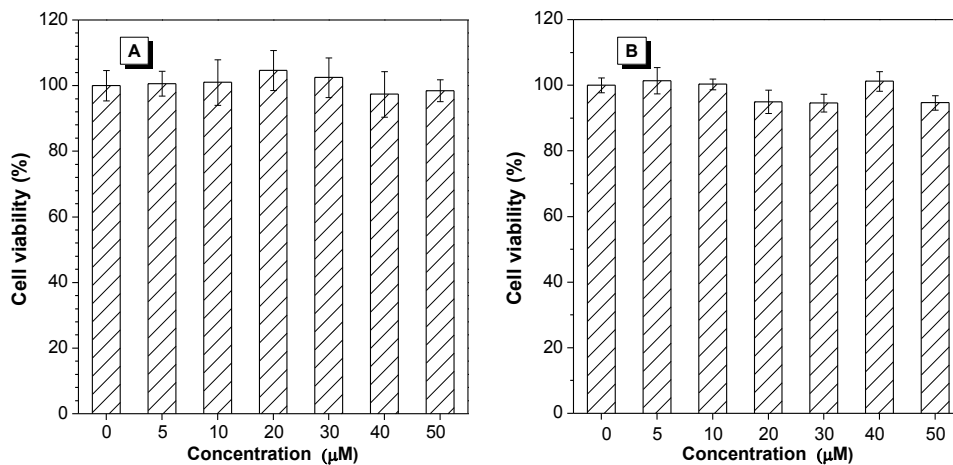

**Fig. S17** The cell viabilities of (A) HeLa cells and (B) MCF-7 cells treated with 2,2'-disulfanediyldiacetate at different concentrations (0, 5, 10, 20, 30, 40, and 50 μM).

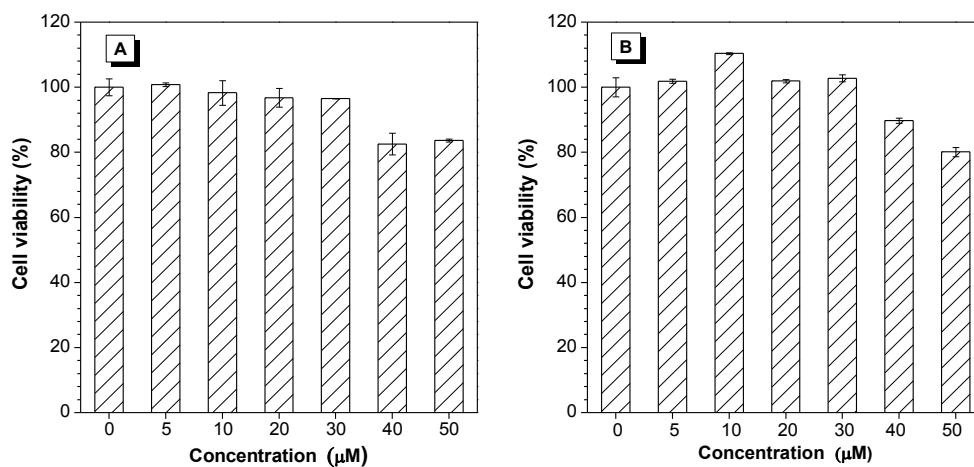

**Fig. S18** The cell viabilities of (A) HeLa cells and (B) MCF-7 cells treated with the in situ generated **3a** at different concentrations (0, 5, 10, 20, 30, 40, and 50 μM).

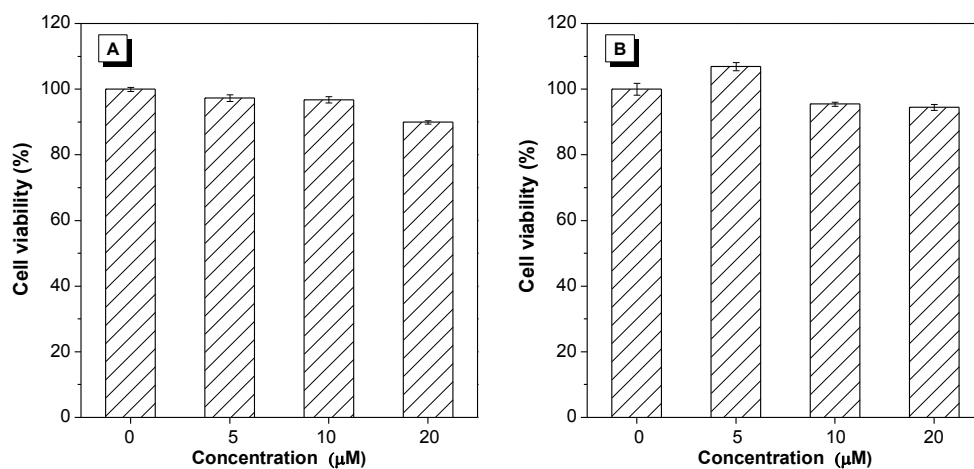

**Fig. S19** The cell viabilities of (A) HeLa cells and (B) MCF-7 cells treated with the in situ generated **3b** at different concentrations (0, 5, 10, and 20 μM).

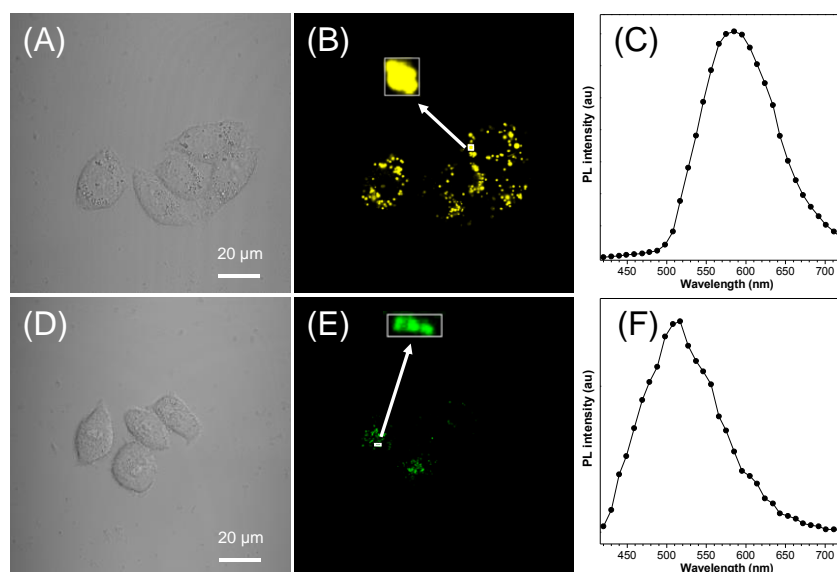

**Fig. S20** The bright field and fluorescence images of HeLa cells treated with the in situ generated **3a** (A, B) and **3b** (D, E) after photoactivation by light irradiation at 405 nm; (C) The PL spectra of **3a** in HeLa cells after photoactivation; (F) The PL spectra of **3b** in HeLa cells after photoactivation.

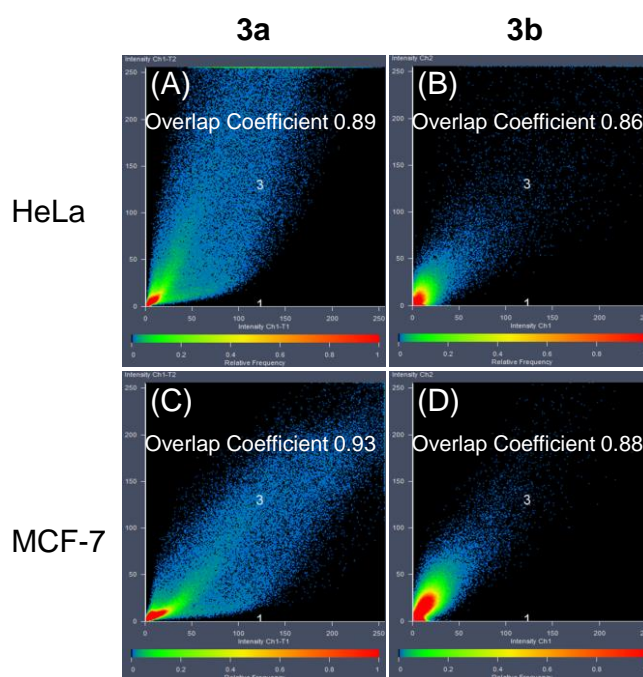

**Fig. S21** The intensity correlation plots of **3a** (Y-axis) after photoactivation and BODIPY493/503 Green (X-axis) in (A) HeLa cells (C) and MCF-7 cells. The intensity correlation plots of **3b** (Y-axis) after photoactivation and LysoTracker Red (X-axis) in (B) HeLa cells and (D) MCF-7 cells.

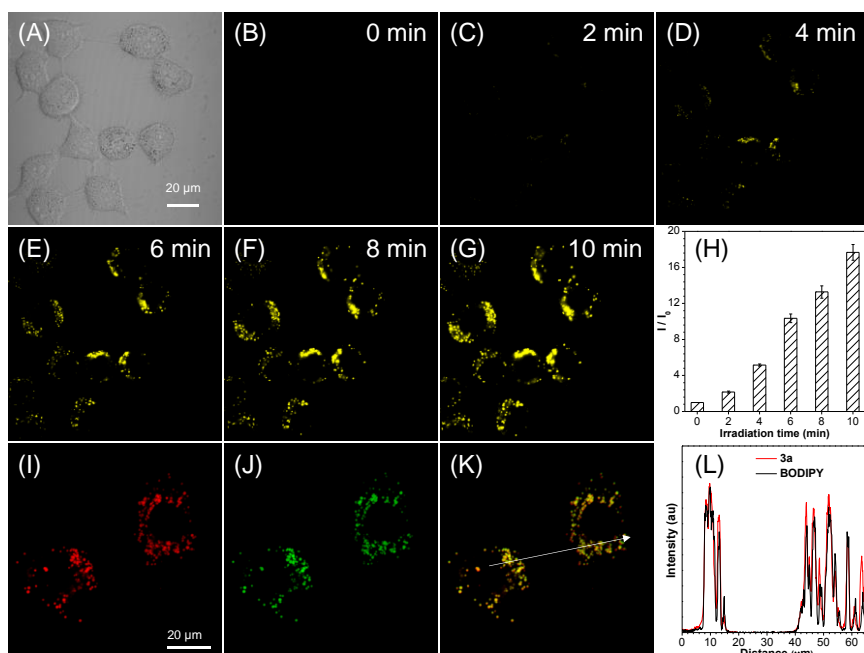

**Fig. S22** (A-G) Bright field and fluorescence images of live MCF-7 cells taken under white light and prolonged irradiation at 405 nm. (H) Plot of fluorescence enhancement ( $I/I_0$ ) of MCF-7 cells with increasing irradiation time at 405 nm. (I-K) Fluorescence images of MCF-7 cells stained with **3a** after photoactivation (red), BODIPY493/503 (green), and the merged image. (L) The intensity profile of ROI lines. [**3a**] = 50  $\mu\text{M}$ .

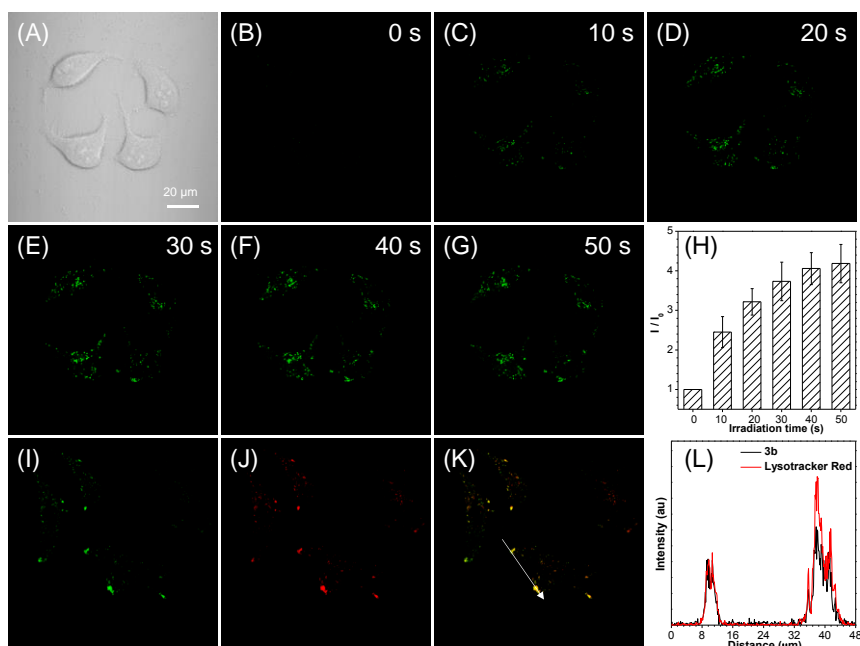

**Fig. S23** (A-G) Bright field and fluorescence images of live MCF-7 cells taken under white light and prolonged irradiation at 405 nm. (H) Plot of fluorescence enhancement ( $I/I_0$ ) of MCF-7 cells with increasing irradiation time at 405 nm. (I-K) Fluorescence images of MCF-7 cells stained with **3b** after photoactivation (green), LysoTracker Red (red), and the merged image. (L) The intensity profile of ROI lines. [**3b**] = 20  $\mu\text{M}$ .



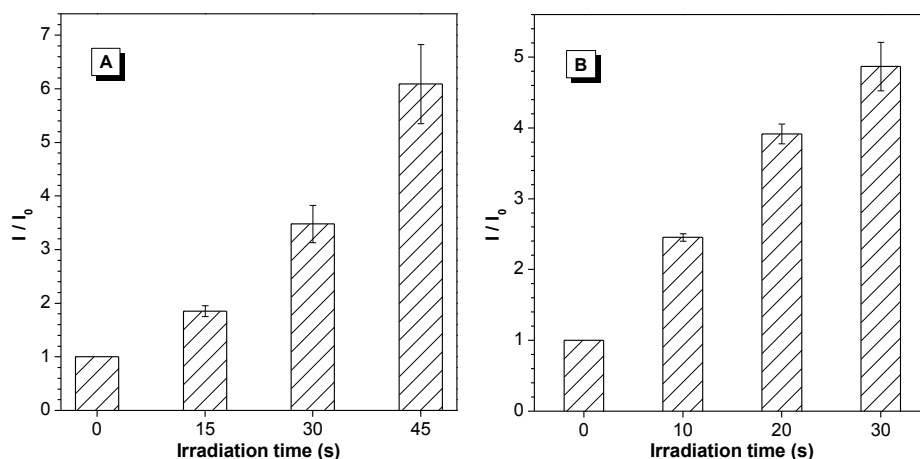

**Fig. S24** Plots of fluorescence enhancement ( $I/I_0$ ) of HeLa cells treated with in situ generated (A) **3a** and (B) **3b** under two-photon irradiation for prolonged time. [**3a**] = 50  $\mu$ M; [**3b**] = 20  $\mu$ M.

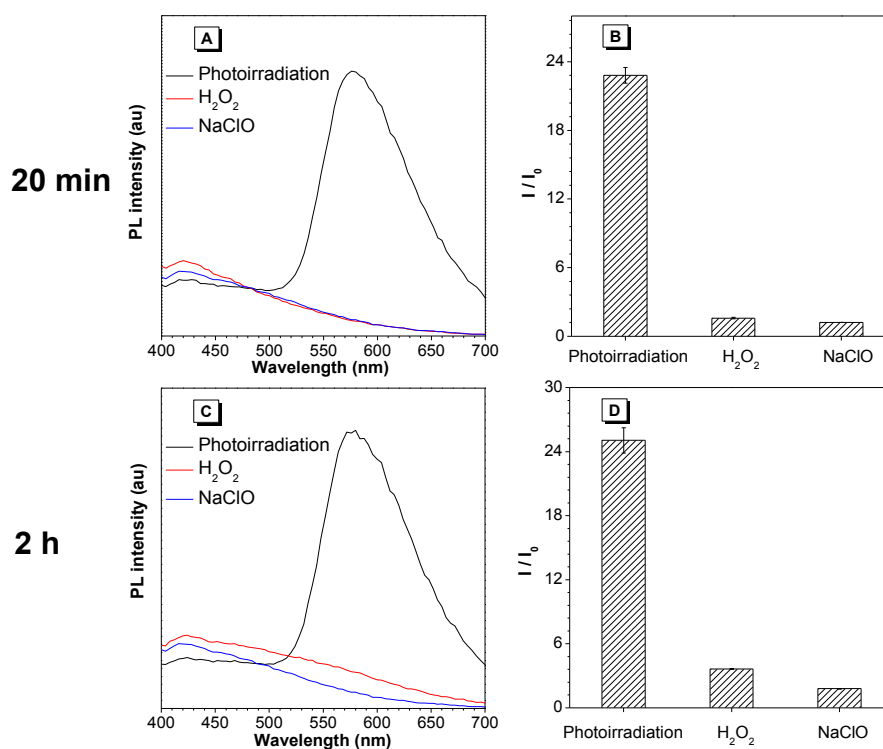

**Fig. S25** (A, C) The PL spectra and (B, D) light-up ratios at 570 nm for the in situ generated **3a** in aqueous solution and treated with UV irradiation (365 nm),  $H_2O_2$ , and NaClO for 20 min and 2 h, respectively. [ $H_2O_2$ ] = [NaClO] = 100  $\mu$ M.

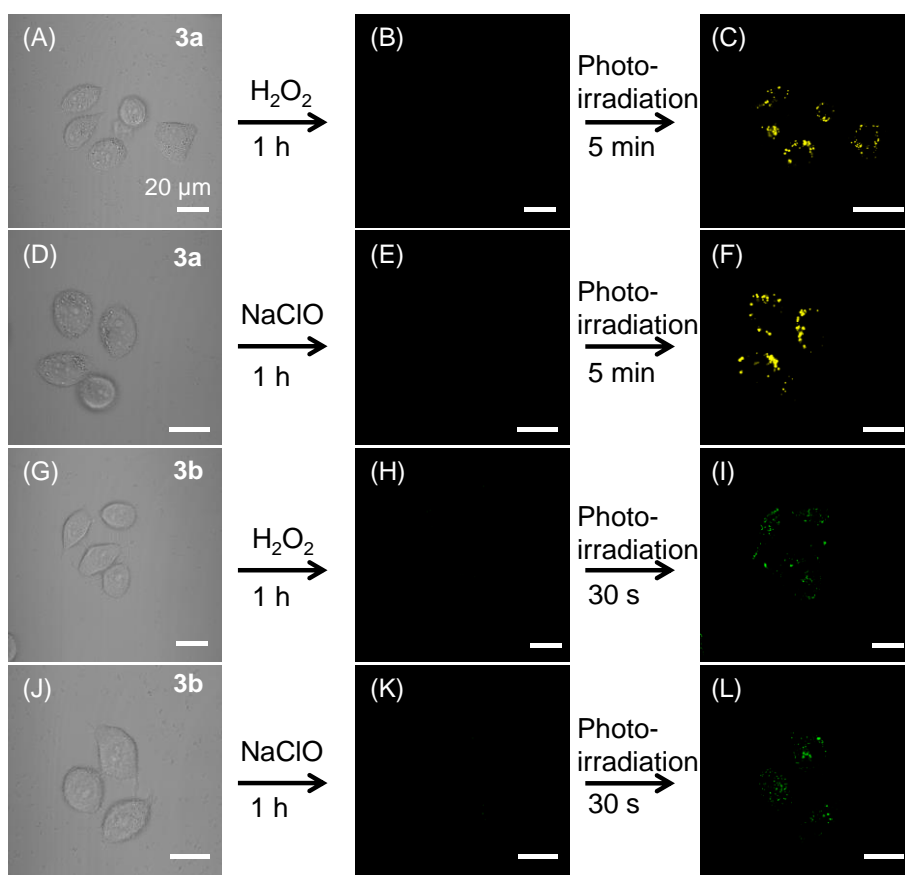

**Fig. S26** Bright field and fluorescence images of HeLa cells stained with the in situ generated **3a** and **3b**. Bright field images (A, D, G, and J); fluorescence images after incubation with  $\text{H}_2\text{O}_2$  or  $\text{NaClO}$  for 20 min (B, E, H and K); fluorescence images after photo-irradiation (405 nm, 10% laser power) for 5 min (C and F); fluorescence images after photo-irradiation (405 nm, 5% laser power) for 30 s (I and L). [**3a**] = 50  $\mu\text{M}$ ; [**3b**] = 20  $\mu\text{M}$ ; [ $\text{H}_2\text{O}_2$ ] = [ $\text{NaClO}$ ] = 100  $\mu\text{M}$ .

### References

- (1) S. T. Chew, K. M. Lo, S. K. Lee, M. P. Heng, W. Y. Teoh, K. S. Sim and K. W. Tan, *Eur. J. Med. Chem.*, 2014, **76**, 397-407.
- (2) X. Wei, J. Li, B. Zhou and S. Qin, *Transit. Metal Chem.*, 2004, **29**, 457-462.
- (3) K. Yamamoto, M. Fujita, K. Tabashi, Y. Kawashima, E. Kato, M. Oya and T. Iso, J. Iwao, *J. Med. Chem.*, 1988, **31**, 919-930.
- (4) P. Raj, A. Singh, K. Kaur, T. Aree, A. Singh and N. Singh, *Inorg. Chem.*, 2016, **55**, 4874-4883.
